# Supplementary material for: The R2R3-MYB Transcription Factor Gene Family in Maize
Source: PLOS journal article supplement (doi:10.1371/journal.pone.0037463), 2012-06-07
Supplement: S1 (10.1371/journal.pone.0037463.s001) [file journal.pone.0037463.s001]

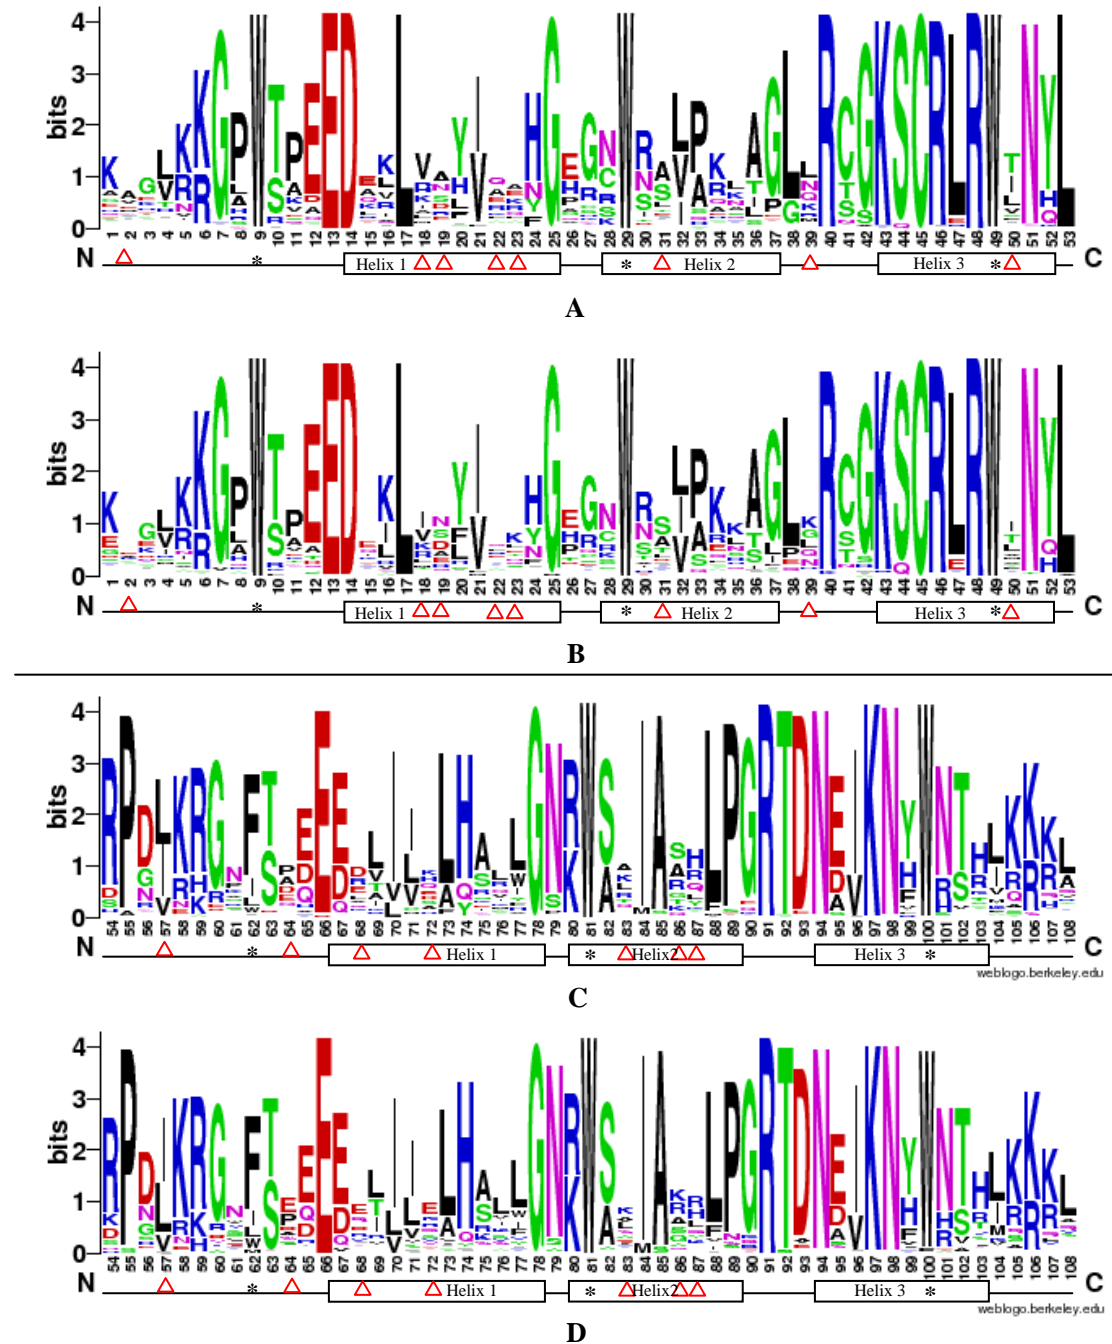

Figure S1. Sequence comparison of the DNA-binding domains in maize and *Arabidopsis* R2R3-MYB genes. The first part includes sequence logos of the R2 in maize (A) and *Arabidopsis* (B), while second part is the R3 in maize (C) and *Arabidopsis* (D), respectively. MYB repeats are based on full-length alignments of all R2R3-MYB domains in these two species. The bit score indicates the information content for each position in the sequence. The position of the three  $\alpha$ -helices that form each MYB repeat are marked (Helix 1 to 3). The asterisks indicate the conserved tryptophan residues (W) in the MYB domain, whereas the residues that are different between maize and *Arabidopsis* MYB domain are marked with triangle marker.
